# Supplementary material for: Unique 3D self-penetrating CoII and NiII coordination frameworks with a new (44.610.8) network topology
Source: Royal Society of Chemistry journal article supplement (doi:10.1039/c0dt00900h), 2010-01-01
Supplement: c0dt00900h.pdf [file c0dt00900h.pdf]

## *Supporting Information*

### **Unique 3-D Self-Penetrating Co<sup>II</sup> and Ni<sup>II</sup> Coordination Frameworks with a New (4<sup>4</sup>.6<sup>10</sup>.8) Network Topology**

Dong-Sheng Li,<sup>\*ac</sup> Feng Fu,<sup>a</sup> Jun Zhao,<sup>a</sup> Ya-Pan Wu,<sup>ac</sup> Miao Du,<sup>\*b</sup> Kun Zou,<sup>a</sup> Wen-Wen Dong<sup>ac</sup> and Yao-Yu Wang<sup>\*c</sup>

<sup>a</sup>*College of Mechanical & Material Engineering, Hubei Key Laboratory of Natural Products Research and Development, China Three Gorges University, Yichang 443002, China;*

<sup>b</sup>*College of Chemistry, Tianjin Key Laboratory of Structure and Performance for Functional Molecule, Tianjin Normal University, Tianjin 300387, China;*

<sup>c</sup>*Key Laboratory of Synthetic and Natural Functional Molecule Chemistry of Ministry of Education, Department of Chemistry, Northwest University, Xi'an 710069, China*

## **Dalton**

\* Corresponding authors

E-mail address: lidongsheng1@126.com (D.-S. Li), Tel./Fax: +86-717-6397516

E-mail address: dumiao@public.tpt.tj.cn (M. Du), Tel./Fax: +86-22-23766556

E-mail address: wyaoyu@nwu.edu.cn (Y.-Y. Wang), Tel./Fax: +86-29-88303798

## Materials and General Methods

All the solvents and reagents for syntheses were commercially available and used as received. The FT-IR spectra were recorded as KBr pellets on a Thermo Nicolet Nexus 670 FTIR spectrometer. Elemental analyses were performed on a Perkin-Elmer 2400 Series II analyzer. Powder X-ray diffraction (PXRD) patterns were taken on a Rigaku D/max-2500 diffractometer for Cu K $\alpha$  radiation ( $\lambda = 1.5406 \text{ \AA}$ ), with a scan speed of  $2^\circ/\text{min}$  and a step size of  $0.02^\circ$  in  $2\theta$ . The calculated PXRD patterns were obtained from the single-crystal X-ray diffraction data. TG analyses were recorded with a NETZSCH STA 449C microanalyzer under nitrogen at a heating rate of  $10^\circ\text{C}\cdot\text{min}^{-1}$ . Variable-temperature magnetic susceptibilities were measured using a MPMS-7 SQUID magnetometer. Diamagnetic corrections were made with Pascal's constants for all constituent atoms.

## Crystallographic Data Collection and Refinement

Single-crystal X-ray diffraction data for complexes **1** and **2** were collected on a Bruker APEX II CCD diffractometer with graphite monochromated Mo K $\alpha$  radiation ( $0.71073 \text{ \AA}$ ) at  $293(2) \text{ K}$ . Empirical absorption corrections were applied by using the SADABS program.<sup>1</sup> The structures were solved by direct methods and refined based on  $F^2$  by the full matrix least-squares methods using SHELXTL.<sup>2,3</sup> All non-hydrogen atoms were refined anisotropically, and the H atoms were generated geometrically and refined as riding. Selected bond lengths and angles are listed in Table S1.

## References

- 1 Sheldrick, G. M. SADABS, *Program for Empirical Absorption Correction of Area Detector Data*, University of Gottingen, Germany, 1997.
- 2 Sheldrick, G. M. SHELXS-97, *Program for the Solution of Crystal Structures*; University of Göttingen, Germany, 1997.
- 3 Sheldrick, G. M. SHELXL, *Program for the Refinement of Crystal Structures*, University of Gottingen, Germany, 1997.

**Table S1** Selected Bond Distances (Å) and Angles (deg) for **1** and **2**

| <b>1</b>            |           | <b>2</b>            |            |
|---------------------|-----------|---------------------|------------|
| Ni(1)–N(2)          | 2.140(8)  | Co(1)–O(5)#1        | 2.060(2)   |
| Ni(1)–O(5)#3        | 2.051(5)  | Co(1)–O(6)#2        | 2.073(3)   |
| Ni(1)–O(6)#2        | 2.034(5)  | Co(1)–O(1)          | 2.100(2)   |
| Ni(1)–O(1)          | 2.082(5)  | Co(1)–O(7)          | 2.1593(16) |
| Ni(1)–O(7)          | 2.095(4)  | Co(1)–N(1)#3        | 2.177(3)   |
| Ni(1)–N(1) #1       | 2.221(6)  | Co(1)–N(2)          | 2.187(3)   |
| O(5)#3–Ni(1)–O(6)#2 | 95.68(19) | O(5)#1–Co(1)–O(6)#2 | 96.67(9)   |
| O(5)#3–Ni(1)–O(1)   | 173.5(2)  | O(5)#1–Co(1)–O(1)   | 172.54(9)  |
| O(6)#2–Ni(1)–O(1)   | 89.40(2)  | O(6)#2–Co(1)–O(1)   | 90.12(9)   |
| O(5)#3–Ni(1)–O(7)   | 95.21(18) | (5)#1–Co(1)–O(7)    | 95.04(8)   |
| O(6)#2–Ni(1)–O(7)   | 85.66(16) | O(6)#2–Co(1)–O(7)   | 84.80(7)   |
| O(1)–Ni(1)–O(7)     | 89.16(19) | O(1)–Co(1)–O(7)     | 88.62(8)   |
| O(5)#3–Ni(1)–N(2)   | 86.50(3)  | O(5)#1–Co(1)–N(1)#3 | 86.85(10)  |
| O(6)#2–Ni(1)–N(2)   | 84.10(2)  | O(6)#2–Co(1)–N(1)#3 | 176.26(10) |
| O(1)–Ni(1)–N(2)     | 90.00(3)  | O(1)–Co(1)–N(1)#3   | 86.29(10)  |
| O(7)–Ni(1)–N(2)     | 169.70(2) | O(7)–Co(1)–N(1)#3   | 96.12(8)   |
| O(5)#3–Ni(1)–N(1)#1 | 83.80(3)  | O(5)#1–Co(1)–N(2)   | 87.29(9)   |
| O(6)#2–Ni(1)–N(1)#1 | 177.10(3) | O(6)#2–Co(1)–N(2)   | 87.22(10)  |
| O(1)–Ni(1)–N(1)#1   | 90.90(3)  | O(1)–Co(1)–N(2)     | 89.99(9)   |
| O(7)–Ni(1)–N(1)#1   | 97.20(3)  | O(7)–Co(1)–N(2)     | 171.90(8)  |
| N(2)–Ni(1)–N(1)#1   | 93.00(3)  | N(1)#3–Co(1)–N(2)   | 91.76(10)  |

Symmetry codes for **1**: #1  $-x-1/2, -y+1/2, -z+1$  ; #2  $x+1/4, -y+1/2, z-1/4$  ; #3  $-x, y-1/4, z-1/4$ ; for **2**: #1  $-x, y-1/4, z-1/4$ ; #2  $x+1/4, -y+1/2, z-1/4$ ; #3  $-x-1/2, -y+1/2, -z+1$

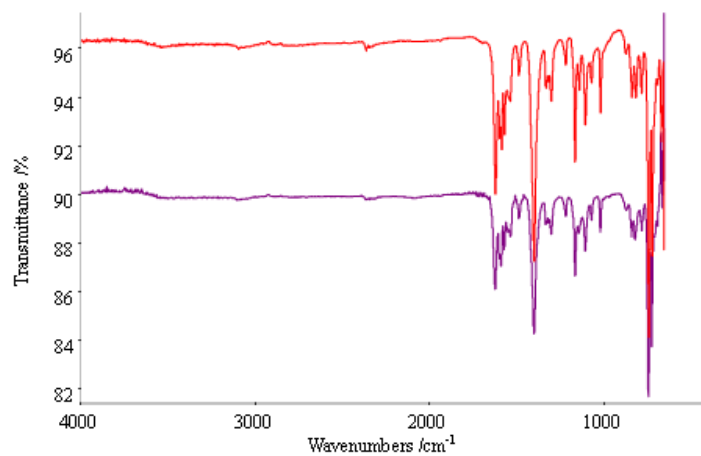

**Figure S1a.** IR spectra for **1** (red) and **2** (purple).

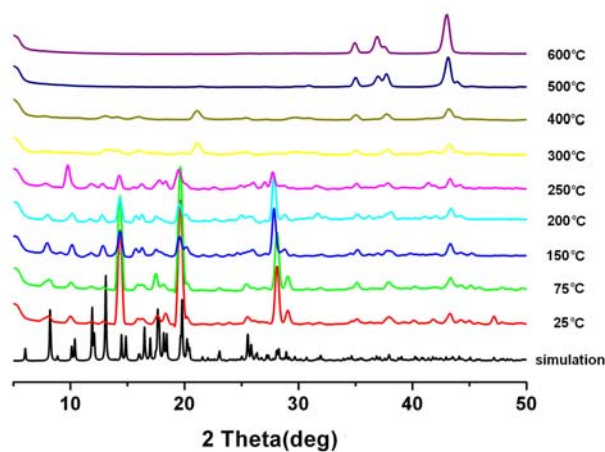

**Figure S1b.** Temperature-variable PXRD patterns for **1**.

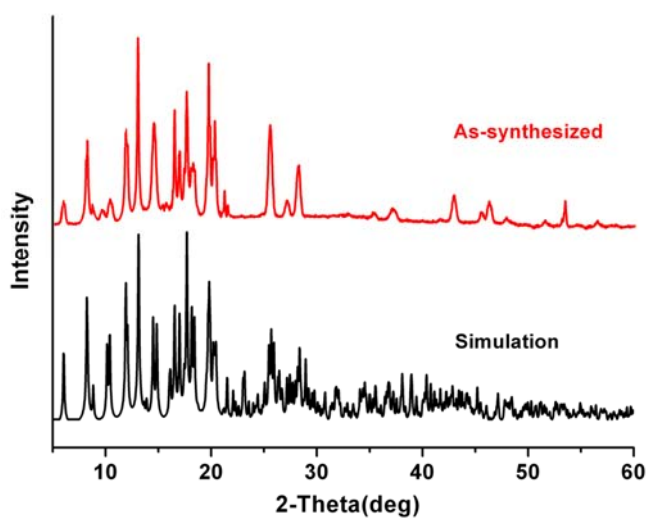

**Figure S1c.** Simulated and experimental PXRD patterns for **1**.

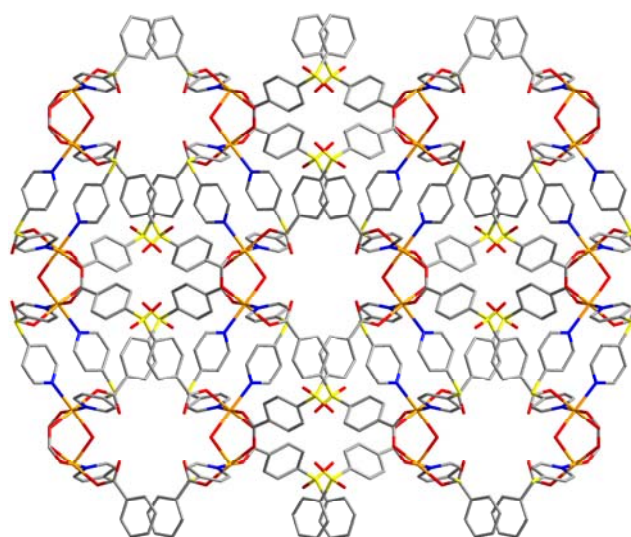

**Figure S2.** 3-D coordination network with 1-D channel of **1**.

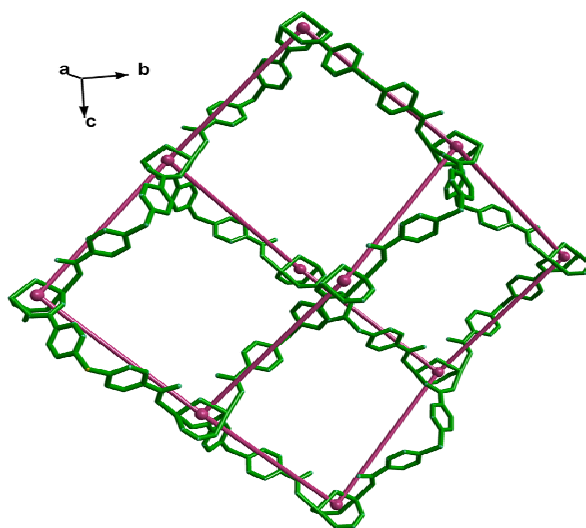

**Figure S3a.** Single diamondoid cages in each net of **1**.

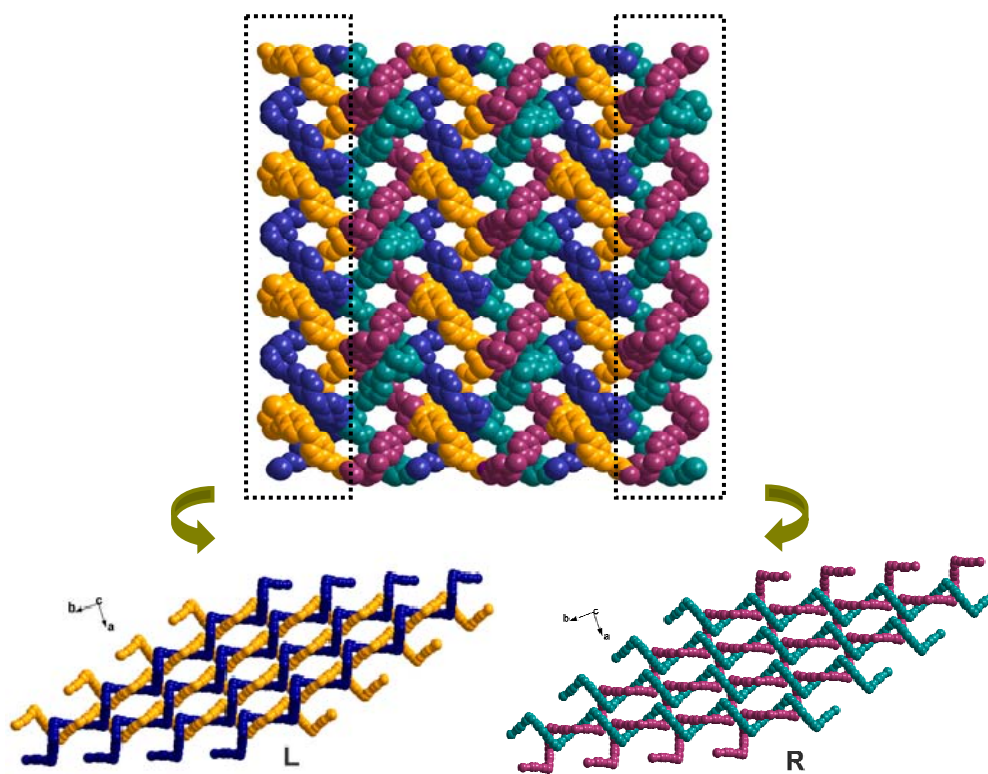

**Figure S3b.** Two **dia** networks building from “warp and weft” type 2-D networks in an alternate fashion.

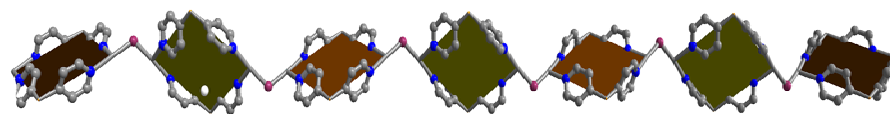

**Figure S3c.** 1-D quadrate loops constructed from the neighboring dimeric Ni<sup>II</sup> SBUs and V-shaped dps ligands.

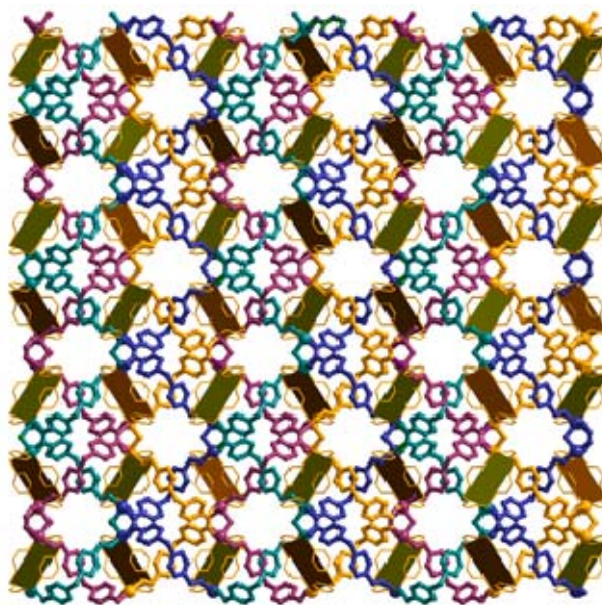

**Figure S3d.** The final self-penetrating pattern constructed from two **dia** networks and 1-D quadrate loops.

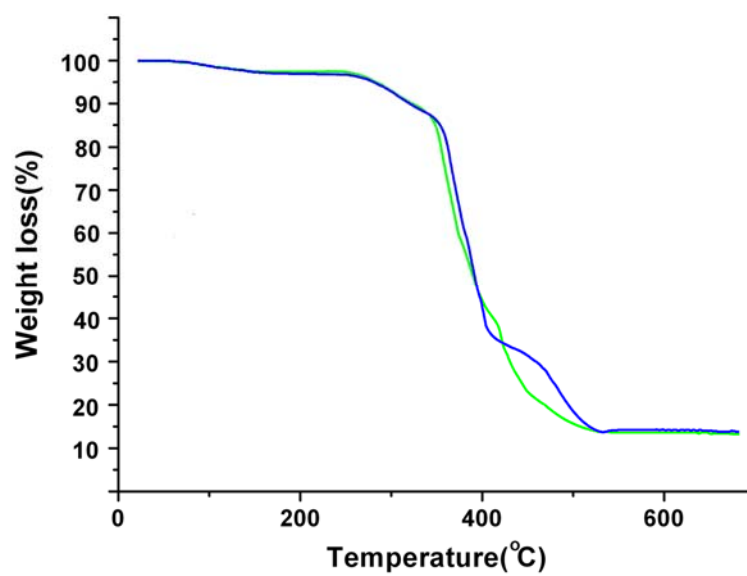

**Figure S4.** TGA curves of 1 (green) and 2 (blue).
